# Supplementary material for: Bridging Learning in Medicine and Citizenship During the COVID-19 Pandemic: A Telehealth-Based Case Study
Source: PubMed Central journal article supplement (PMC7935247; doi:10.2196/24795), 2021-03-04

**Tele Coronavirus**  
**Version 20**  
**Date: 31/07/2020**

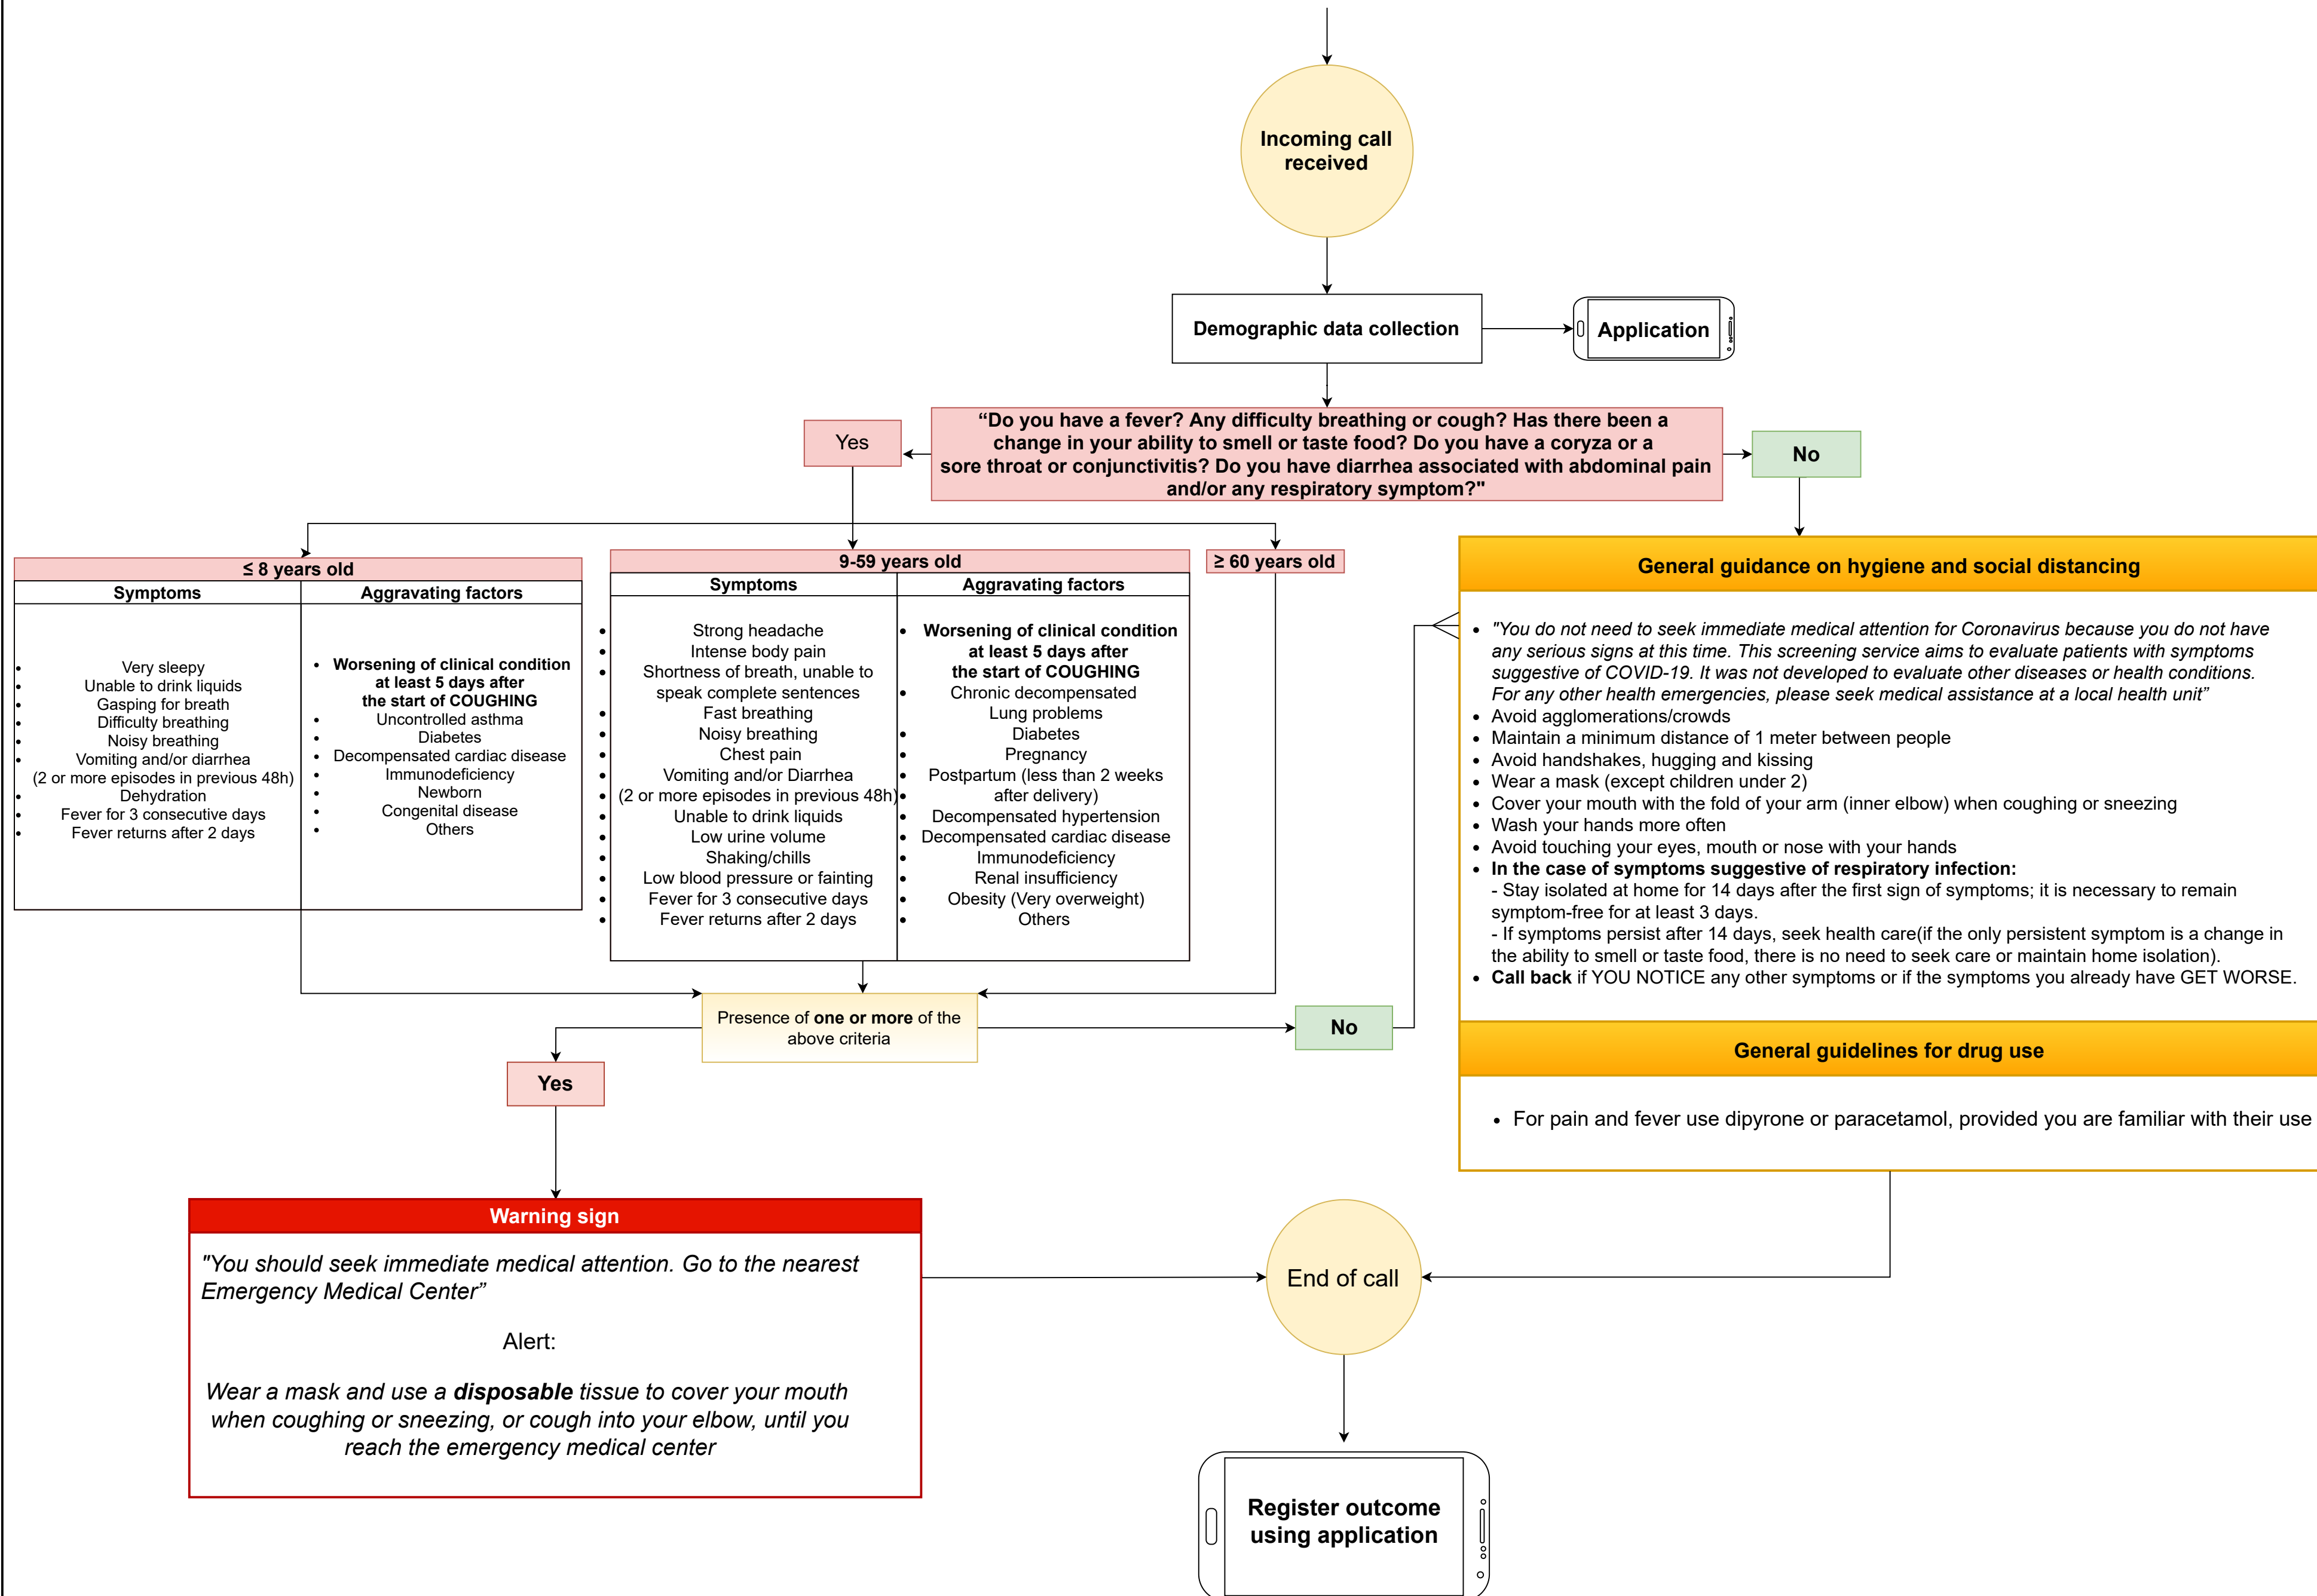

Supplement: publichealth_v7i3e24795_app1.pdf [file publichealth_v7i3e24795_app1.pdf]
